# Supplementary material for: Highly recyclable Ag NPs/alginate composite beads prepared via one-pot encapsulation method for efficient continuous reduction of p-nitrophenol
Source: Royal Society of Chemistry journal article supplement (doi:10.1039/c7nj03467a), 2017-01-01
Supplement: c7nj03467a1.pdf [file c7nj03467a1.pdf]

# Highly recyclable Ag NPs/alginate composite beads prepared *via* one-pot encapsulation method for efficient continuous reduction of *p*-nitrophenol

Ce Gao <sup>a</sup>, Qingda An <sup>a,\*</sup>, Zuoyi Xiao <sup>a</sup>, Shangru Zhai <sup>a,\*</sup>, Bin Zhai <sup>a</sup>, Zhan Shi <sup>b</sup>

<sup>a</sup> *Faculty of Light Industry and Chemical Engineering, Dalian Polytechnic University, Dalian 116034, China*

<sup>b</sup> *State Key Laboratory of Inorganic Synthesis and Preparative Chemistry, College of Chemistry, Jilin University, Changchun 130012, China*

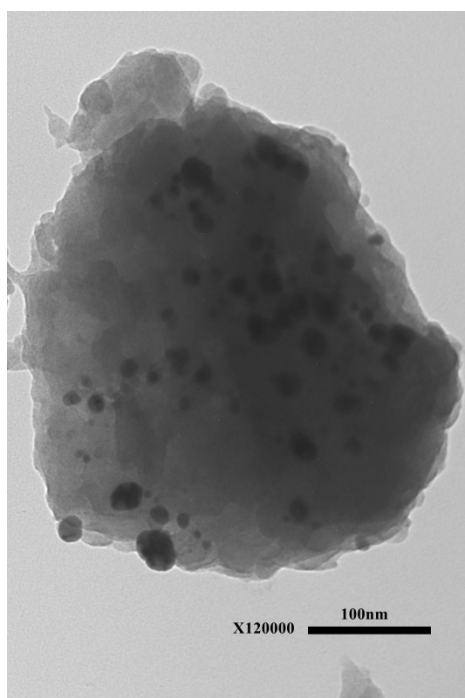

Fig. S1 TEM image of recycled 10% Ag-CAHB

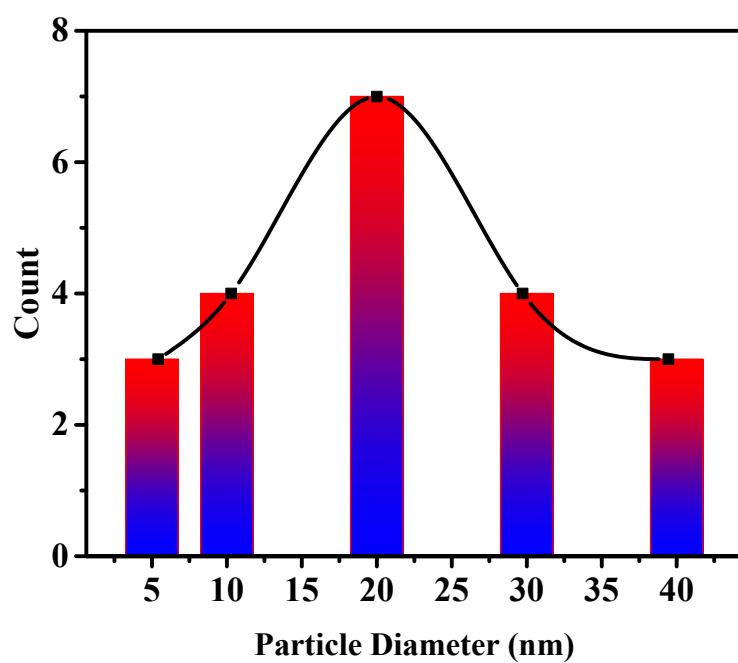

Fig. S2 The silver particle size distribution in the typical sample (10% Ag-CAHB)
